# Supplementary material for: Mendelian Randomization Analysis of ITGA2 and ECM1 in Obstructive Sleep Apnea: Genetic and Tissue-Specific Evidence
Source: Research Square preprint supplement (doi:10.21203/rs.3.rs-6277320/v1), 2025-04-17
Supplement: Supplementary file 1 [file a145f597c1f81d590a860a74.docx]

**STROBE-MR checklist of recommended items to address in reports of Mendelian randomization studies**12

| **Item No.** | **Section** | **Checklist item** | **Page No.** | **Relevant text from manuscript** |
| --- | --- | --- | --- | --- |
| 1 | **TITLE and ABSTRACT** | Indicate Mendelian randomization (MR) as the study’s design in the title and/or the abstract if that is a main purpose of the study |  | Mendelian Randomization Analysis of ITGA2 and ECM1 in Obstructive Sleep Apnea: Genetic and Tissue-Specific Evidence |
|  | **INTRODUCTION** |  |  |  |
| 2 | **Background** | Explain the scientific background and rationale for the reported study. What is the exposure? Is a potential causal relationship between exposure and outcome plausible? Justify why MR is a helpful method to address the study question |  | Obstructive sleep apnea (OSA) is a chronic condition characterized by periodic upper airway obstruction during sleep, often accompanied by chronic intermittent hypoxia and sleep fragmentation, with a global prevalence of 9%-38% [2]. It is a major public health concern due to its widespread impact on multiple systems and association with increased mortality risk [3]. Continuous positive airway pressure (CPAP), the standard treatment for OSA, alleviates symptoms and improves some clinical outcomes but is limited by poor patient adherence [4]. Gene expression of ITGA2 and ECM1, encoding integrin α2 and extracellular matrix protein 1, respectively, may influence OSA through mechanisms such as airway remodeling and inflammation, suggesting a plausible causal link supported by observational studies [5]. However, these studies are confounded by biases and reverse causation. Mendelian randomization (MR), leveraging the random allocation of genetic variants, overcomes these limitations, providing a robust approach to infer causal relationships between ITGA2/ECM1 expression and OSA risk. |
| 3 | **Objectives** | State specific objectives clearly, including pre-specified causal hypotheses (if any). State that MR is a method that, under specific assumptions, intends to estimate causal effects |  | This study aimed to evaluate the causal effects of ITGA2 and ECM1 gene expression on obstructive sleep apnea (OSA) risk using two-sample Mendelian randomization (MR), hypothesizing that increased expression elevates OSA risk. We further sought to validate these associations through colocalization analysis, Summary-data-based Mendelian Randomization (SMR) for causal inference, MetaXcan to assess tissue-specific effects, and multi-phenotype MR (Ph-MR) to evaluate potential side effects of ITGA2 and ECM1 as drug target genes across 821 related traits. |
|  | **METHODS** |  |  |  |
| 4 | **Study design and data sources** | Present key elements of the study design early in the article. Consider including a table listing sources of data for all phases of the study. For each data source contributing to the analysis, describe the following: |  | This study utilized a two-sample Mendelian randomization (MR) design, supplemented by colocalization, SMR, MetaXcan, and multi-phenotype MR (Ph-MR) analyses, to evaluate the causal effects of ITGA2 and ECM1 gene expression on obstructive sleep apnea (OSA) and assess potential side effects |
|  | a) | Setting: Describe the study design and the underlying population, if possible. Describe the setting, locations, and relevant dates, including periods of recruitment, exposure, follow-up, and data collection, when available. |  | Exposure data were sourced from the eQTLGen consortium ([https://www.eqtlgen.org/cis-eqtls.html](https://www.eqtlgen.org/cis-eqtls.html" \t "_blank)), a meta-analysis of cis-eQTLs from 31,684 blood samples. Tissue-specific expression data for ITGA2 and ECM1 were obtained via MetaXcan from GTEx v8, focusing on hypothalamus, whole blood, subcutaneous fat, left ventricle, and hippocampus. Outcome data for OSA were obtained from the FinnGen Release 9 dataset (finngen_R9_G6_SLEEPAPNO.gz), a biobank of Finnish individuals (recruitment: 2017-2022). For Ph-MR, GWAS data for 821 traits were sourced from the MRC IEU OpenGWAS dataset ([https://gwas.mrcieu.ac.uk/](https://gwas.mrcieu.ac.uk/" \t "_blank)) to evaluate side effects. |
|  | b) | Participants: Give the eligibility criteria, and the sources and methods of selection of participants. Report the sample size, and whether any power or sample size calculations were carried out prior to the main analysis |  | FinnGen OSA cases (n=38,998) and controls (n=336,659) were defined using ICD-10 code G47.3. eQTLGen participants were healthy individuals; no overlap with FinnGen was assumed. |
|  | c) | Describe measurement, quality control and selection of genetic variants |  | Cis-eQTLs were selected from eQTLGen (P<5×10⁻⁸, MAF>0.01), clumped (R²<0.1, 10,000 kb window), with F>10. FinnGen data underwent quality control (INFO>0.95). |
|  | d) | For each exposure, outcome, and other relevant variables, describe methods of assessment and diagnostic criteria for diseases |  | Exposures were ITGA2 and ECM1 expression (eQTLGen beta coefficients, MetaXcan z-scores from specified tissues); the outcome was OSA risk (FinnGen log-odds ratios). Ph-MR assessed 821 traits from MRC IEU OpenGWAS as potential side effects. Covariates in FinnGen included age, sex, and 10 PCs; eQTLGen data were unadjusted. |
|  | e) | Provide details of ethics committee approval and participant informed consent, if relevant |  | FinnGen and eQTLGen obtained ethical approvals (finngen.fi, eqtlgen.org). |
| 5 | **Assumptions** | Explicitly state the three core IV assumptions for the main analysis (relevance, independence and exclusion restriction) as well assumptions for any additional or sensitivity analysis |  | This Mendelian randomization (MR) study relied on three assumptions: (1) Relevance: Cis-eQTLs strongly predict ITGA2 and ECM1 expression (F>10, TwoSampleMR). (2) Independence: Variants are independent of confounders, supported by FinnGen adjustment for age, sex, and 10 PCs. (3) Exclusion restriction: Variants influence OSA solely via ITGA2 and ECM1, assessed by MR-Egger (ITGA2: p=0.1739; ECM1: p=0.9780), MR-PRESSO, colocalization (ITGA2: PP.H4=0.778, ECM1: PP.H4=0.902), and SMR (ECM1: p=0.0002, ITGA2: p=0.0002, HEIDI p>0.05), indicating no pleiotropy. |
| 6 | **Statistical methods: main analysis** | Describe statistical methods and statistics used |  |  |
|  | a) | Describe how quantitative variables were handled in the analyses (i.e., scale, units, model) |  | The exposures, ITGA2 and ECM1 gene expression, were quantified as beta coefficients (eQTLGen, in standard deviation units) and z-scores (MetaXcan, derived from GTEx v8 across hypothalamus, whole blood, subcutaneous fat, left ventricle, and hippocampus). The outcome, obstructive sleep apnea (OSA) risk, was measured as log-odds ratios (FinnGen). Analyses employed linear models using the inverse-variance weighted (IVW) method with Wald ratios. |
|  | b) | Describe how genetic variants were handled in the analyses and, if applicable, how their weights were selected |  | Cis-eQTLs for ITGA2 and ECM1 were selected from eQTLGen (P<5×10⁻⁸, minor allele frequency >0.01) and clumped using PLINK (R²<0.1, 10,000 kb window) to ensure independence. Weights were based on eQTLGen beta coefficients, with instrument strength verified (F-statistic >10). |
|  | c) | Describe the MR estimator (e.g. two-stage least squares, Wald ratio) and related statistics. Detail the included covariates and, in case of two-sample MR, whether the same covariate set was used for adjustment in the two samples |  | The primary MR estimator was the IVW method, combining Wald ratios across variants (ITGA2: OR=1.10, 95% CI: 1.07-1.13, p=0.0679; ECM1: OR=1.16, 95% CI: 1.09-1.24, p=0.0393). Sensitivity analyses included MR-Egger and weighted median methods (ITGA2: OR=1.10, p=0.0001; ECM1: OR=1.19, p=0.0015). Additional analyses comprised SMR (ECM1/ITGA2: p=0.0002, HEIDI p>0.05), MetaXcan for tissue-specific effects, and Ph-MR across 821 traits from MRC IEU OpenGWAS to assess drug target side effects. FinnGen data were adjusted for age, sex, and 10 principal components (PCs); eQTLGen data were unadjusted due to lack of covariate information. |
|  | d) | Explain how missing data were addressed |  | Missing data were minimized by applying quality control (FinnGen: INFO>0.95). Variants with missing data were excluded during TwoSampleMR harmonization (action=2). |
|  | e) | If applicable, indicate how multiple testing was addressed |  | FDR correction was applied to account for multiple comparisons across analyses, including MetaXcan, SMR, and Ph-MR (details in Results). |
| 7 | **Assessment of assumptions** | Describe any methods or prior knowledge used to assess the assumptions or justify their validity |  | The validity of the Mendelian randomization (MR) assumptions was assessed as follows: (1) **Relevance:** The strength of genetic instruments (cis-eQTLs) for ITGA2 and ECM1 expression was confirmed using F-statistics via TwoSampleMR (F>10 for all instruments). (2) **Independence:** Independence from confounders was supported by FinnGen adjustments for age, sex, and 10 principal components (PCs). eQTLGen data were unadjusted, but no sample overlap with FinnGen was assumed, reducing confounding risk. (3) **Exclusion restriction:** Pleiotropy was evaluated using MR-Egger regression (ITGA2: intercept p=0.1739; ECM1: p=0.9780), indicating no significant directional pleiotropy. Heterogeneity was assessed with Cochran’s Q (ITGA2: Q_pval=0.5829 [Egger], 0.5279 [IVW]; ECM1: Q_pval=0.2754 [Egger], 0.3763 [IVW]), showing no significant issues. Colocalization analysis supported shared causal variants (ITGA2: PP.H4=0.778, ECM1: PP.H4=0.902), and SMR confirmed causality (p=0.0002, HEIDI p>0.05), further validating the exclusion restriction assumption. |
| 8 | **Sensitivity analyses and additional analyses** | Describe any sensitivity analyses or additional analyses performed (e.g. comparison of effect estimates from different approaches, independent replication, bias analytic techniques, validation of instruments, simulations) |  | Sensitivity analyses were conducted to assess the robustness of the MR findings. MR-Egger regression was used to detect pleiotropy (ITGA2: intercept p=0.1739; ECM1: p=0.9780), indicating no significant directional pleiotropy. The weighted median method provided robust effect estimates (ITGA2: OR=1.10, p=0.0001; ECM1: OR=1.19, p=0.0015), and Cochran’s Q statistic evaluated heterogeneity (ITGA2: Q_pval=0.5829 [Egger], 0.5279 [IVW]; ECM1: Q_pval=0.2754 [Egger], 0.3763 [IVW]), showing no significant issues. Instrument strength was validated with F-statistics (F>10) via TwoSampleMR. Additional analyses included MetaXcan to explore tissue-specific effects using GTEx v8 data (significant for ECM1 in subcutaneous fat, hypothalamus, and left ventricle [z=3.58, p=0.0003], and ITGA2 in hippocampus [z=2.23, p=0.025]), SMR (version 1.3.1.win) to confirm causality (p=0.0002, HEIDI p>0.05), and colocalization analysis to validate shared causal variants (ITGA2: PP.H4=0.778, ECM1: PP.H4=0.902). No simulations or independent replication were performed. |
| 9 | **Software and pre-registration** |  |  |  |
|  | a) | Name statistical software and package(s), including version and settings used |  | All analyses were conducted using R (version 4.2.2). The TwoSampleMR package was employed for Mendelian randomization (MR) analyses, with settings including a significance threshold of P<5×10⁻⁸ for SNP selection, clumping at R²<0.1 within a 10,000 kb window, and harmonization set to action=2 to exclude ambiguous variants. PLINK was used for SNP clumping with the same linkage disequilibrium threshold (R²<0.1, 10,000 kb). MetaXcan (version not specified) analyzed tissue-specific effects using GTEx v8 data across hypothalamus, whole blood, subcutaneous fat, left ventricle, and hippocampus. SMR (version 1.3.1.win) was applied with default settings (p_SMR<0.05, HEIDI p>0.05) to assess causality. |
|  | b) | State whether the study protocol and details were pre-registered (as well as when and where) |  | This study was not pre-registered. The study protocol and analysis plan were developed iteratively based on data availability and are fully reported in this manuscript. |
|  | **RESULTS** |  |  |  |
| 10 | **Descriptive data** |  |  |  |
|  | a) | Report the numbers of individuals at each stage of included studies and reasons for exclusion. Consider use of a flow diagram |  | The exposure dataset from eQTLGen included 31,684 blood samples after quality control (no exclusions specified in the source data). The outcome dataset from FinnGen Release 9 (finngen_R9_G6_SLEEPAPNO) comprised 38,998 OSA cases and 336,659 controls (ICD-10 code G47.3), with no samples excluded after applying quality control (INFO>0.95). A flow diagram detailing sample selection is provided in Supplementary Figure 1. |
|  | b) | Report summary statistics for phenotypic exposure(s), outcome(s), and other relevant variables (e.g. means, SDs, proportions) |  | The exposures, ITGA2 and ECM1 gene expression, were quantified as beta coefficients (eQTLGen, SD units) and z-scores (MetaXcan, GTEx v8). The outcome, OSA risk, was measured as log-odds ratios (FinnGen). Summary statistics (e.g., means, SDs) for exposures and outcomes were not directly reported but are available in the source datasets (eQTLGen, FinnGen). |
|  | c) | If the data sources include meta-analyses of previous studies, provide the assessments of heterogeneity across these studies |  | The eQTLGen dataset is a meta-analysis of 31,684 samples. Heterogeneity for ITGA2 and ECM1 associations with OSA was assessed using Cochran’s Q statistic (ITGA2: Q_pval=0.5829 [Egger], 0.5279 [IVW]; ECM1: Q_pval=0.2754 [Egger], 0.3763 [IVW]), indicating no significant heterogeneity. |
|  | d) | For two-sample MR:  i.  Provide justification of the similarity of the genetic variant-exposure associations between the exposure and outcome samples  ii.  Provide information on the number of individuals who overlap between the exposure and outcome studies |  | **i.** The genetic variant-exposure associations were assumed similar between eQTLGen and FinnGen samples, as both datasets are derived from European populations with comparable genetic backgrounds, minimizing ancestry-related bias. **ii.** No individuals overlapped between eQTLGen (blood samples) and FinnGen (Finnish biobank), as they are independent studies with distinct recruitment protocols. |
| 11 | **Main results** |  |  |  |
|  | a) | Report the associations between genetic variant and exposure, and between genetic variant and outcome, preferably on an interpretable scale |  | Cis-eQTLs for ITGA2 and ECM1 were selected from eQTLGen (P<5×10⁻⁸, F>10), indicating strong associations with gene expression (beta coefficients in SD units). The associations between these variants and OSA risk (FinnGen) were measured as odds ratios. |
|  | b) | Report MR estimates of the relationship between exposure and outcome, and the measures of uncertainty from the MR analysis, on an interpretable scale, such as odds ratio or relative risk per SD difference |  | In a large-scale gene screening, MR analysis (IVW method) identified ITGA2 and ECM1 as positive drug target candidates for OSA. A 1 SD increase in ITGA2 expression was associated with a 10.19% increased odds of OSA (OR=1.1019, 95% CI: 1.0703-1.1345, p<0.001, nsnp=28), and a 1 SD increase in ECM1 expression increased the odds by 16.46% (OR=1.1646, 95% CI: 1.0934-1.2405, p<0.001, nsnp=8). Weighted median estimates were consistent (ITGA2: OR=1.10, p=0.0001; ECM1: OR=1.19, p=0.0015). |
|  | c) | If relevant, consider translating estimates of relative risk into absolute risk for a meaningful time period |  | Translation to absolute risk was not performed due to the absence of baseline OSA incidence rates in FinnGen.. |
|  | d) | Consider plots to visualize results (e.g. forest plot, scatterplot of associations between genetic variants and outcome versus between genetic variants and exposure) |  | A forest plot (Figure2) summarizes the IVW ORs and 95% CIs for all screened genes, including ITGA2 and ECM1, highlighting their significant associations with OSA. |
| 12 | **Assessment of assumptions** |  |  |  |
|  | a) | Report the assessment of the validity of the assumptions |  | The MR assumptions were validated through multiple analyses. The relevance assumption was supported by strong instruments (F>10; ITGA2: nsnp=28; ECM1: nsnp=8). The independence assumption was upheld, with no sample overlap between eQTLGen and FinnGen, and FinnGen data adjusted for age, sex, and 10 principal components. The exclusion restriction assumption was confirmed by MR-Egger regression, showing no significant directional pleiotropy (ITGA2: intercept p=0.1739; ECM1: p=0.9780). Colocalization (ITGA2: PP.H4=0.778; ECM1: PP.H4=0.902) and SMR (p=0.0002, HEIDI p>0.05) further supported causality, indicating minimal violation of MR assumptions. |
|  | b) | Report any additional statistics (e.g., assessments of heterogeneity across genetic variants, such as *I2*, Q statistic or E-value) |  | Heterogeneity across genetic variants was minimal, as assessed by Cochran’s Q (ITGA2: Q_pval=0.5829 [Egger], 0.5279 [IVW]; ECM1: Q_pval=0.2754 [Egger], 0.3763 [IVW]). I² statistics were not calculated due to the limited number of SNPs for ECM1 (nsnp=8). |
| 13 | **Sensitivity analyses and additional analyses** |  |  |  |
|  | a) | Report any sensitivity analyses to assess the robustness of the main results to violations of the assumptions |  | SMR analysis confirmed causality (p_SMR=0.0002), with HEIDI indicating no significant pleiotropy for ITGA2 (p_HEIDI=0.2084) but mild heterogeneity for ECM1 (p_HEIDI=0.041). |
|  | b) | Report results from other sensitivity analyses or additional analyses |  | MetaXcan revealed tissue-specific effects (ECM1 in hypothalamus, whole blood, subcutaneous fat, and left ventricle: z-score > 0; ITGA2 in hippocampus and left ventricle: P<0.05). Colocalization validated shared causal variants (ITGA2: PP.H4=0.778; ECM1: PP.H4=0.902) |
|  | c) | Report any assessment of direction of causal relationship (e.g., bidirectional MR) |  | Bidirectional MR was not conducted |
|  | d) | When relevant, report and compare with estimates from non-MR analyses |  | Not performed |
|  | e) | Consider additional plots to visualize results (e.g., leave-one-out analyses) |  | A forest plot and scatter plots, generated but not included, could be considered for visualization. |
|  | **DISCUSSION** |  |  |  |
| 14 | **Key results** | Summarize key results with reference to study objectives |  | The study aimed to identify druggable targets causally associated with OSA risk. Key results showed ITGA2 (OR=1.102, 95% CI: 1.06–1.15, FDR P=1.85×10⁻⁷) and ECM1 (OR=1.165, 95% CI: 1.04–1.30, FDR P=0.0065) increased OSA risk. SMR (p_SMR=0.0002) and colocalization (ITGA2: PP.H4=0.778; ECM1: PP.H4=0.902) supported causality, though ECM1 showed HEIDI heterogeneity (p_HEIDI=0.041). MetaXcan identified tissue-specific effects (ITGA2 in hippocampus and left ventricle; ECM1 in hypothalamus, whole blood, subcutaneous fat, and left ventricle). |
| 15 | **Limitations** | Discuss limitations of the study, taking into account the validity of the IV assumptions, other sources of potential bias, and imprecision. Discuss both direction and magnitude of any potential bias and any efforts to address them |  | This study has several limitations that warrant consideration. Regarding the validity of the instrumental variable (IV) assumptions, the relevance assumption was supported by strong instruments (F>10), though the limited number of SNPs for ECM1 (nsnp=8) may reduce statistical power, potentially underestimating the effect size. The independence assumption was addressed by adjusting FinnGen data for age, sex, and 10 principal components, and no sample overlap with eQTLGen minimized confounding, though residual population stratification in European populations could introduce minor bias. The exclusion restriction assumption was supported by MR-Egger (ITGA2: p=0.1739; ECM1: p=0.9780) and colocalization (ITGA2: PP.H4=0.778; ECM1: PP.H4=0.902), but the lack of bidirectional MR leaves reverse causation unassessed, which could bias the causal direction toward gene expression to OSA. Other potential biases include the use of GTEx v8 data in MetaXcan, which lacks OSA-specific tissues like upper airway mucosa, possibly misrepresenting tissue-specific effects. Imprecision is evident due to the small SNP count for ECM1 and the absence of baseline OSA incidence rates, preventing absolute risk estimation. Efforts to mitigate bias included harmonizing SNPs with TwoSampleMR and adjusting covariates in FinnGen, though these measures may not fully eliminate all confounding or imprecision. |
| 16 | **Interpretation** |  |  |  |
|  | a) | Meaning: Give a cautious overall interpretation of results in the context of their limitations and in comparison with other studies |  | Our findings suggest that ITGA2 and ECM1 expression increases OSA risk by 10.19% (OR=1.1019, 95% CI: 1.0703-1.1345, p<0.001) and 16.46% (OR=1.1646, 95% CI: 1.0934-1.2405, p<0.001) per 1 SD, respectively. However, these results should be interpreted cautiously due to limitations. The small SNP count for ECM1 (nsnp=8) may reduce statistical power, and ECM1’s HEIDI test (p=0.041) indicates potential pleiotropy or unadjusted confounding, weakening causal inference. The lack of bidirectional MR leaves reverse causation unexplored. While ITGA2’s role aligns with airway remodeling in OSA, ECM1’s causality requires further validation through larger studies. |
|  | b) | Mechanism: Discuss underlying biological mechanisms that could drive a potential causal relationship between the investigated exposure and the outcome, and whether the gene-environment equivalence assumption is reasonable. Use causal language carefully, clarifying that IV estimates may provide causal effects only under certain assumptions |  | ITGA2, encoding integrin alpha-2, likely contributes to OSA by regulating airway smooth muscle cell adhesion and migration, affecting airway mechanics and increasing stiffness and collapse risk, consistent with OSA’s airway remodeling features. ECM1, an extracellular matrix protein, may influence OSA by modulating the airway microenvironment or fibrotic processes, potentially via systemic inflammation or metabolic pathways, as evidenced by its expression in hypothalamus, whole blood, and subcutaneous fat (MetaXcan: z=3.58, p=0.0003). The gene-environment equivalence assumption is plausible if genetic upregulation mimics chronic hypoxia, but this requires OSA-specific tissue data, as GTEx lacks upper airway mucosa. IV estimates suggest causality only under assumptions of no pleiotropy (MR-Egger: ITGA2 p=0.1739, ECM1 p=0.9780) and no unmeasured confounding. |
|  | c) | Clinical relevance: Discuss whether the results have clinical or public policy relevance, and to what extent they inform effect sizes of possible interventions |  | ITGA2 and ECM1 are promising drug targets for OSA, with modest effect sizes (ORs of 1.10 and 1.16) suggesting potential for targeted therapies. We evaluated their drug development potential via the Open Targets platform [1], finding ITGA2 as a validated target for ulcerative colitis and relapsing-remitting multiple sclerosis, with Vatelizumab (an anti-α2 integrin monoclonal antibody) in phase II clinical trials, offering a foundation for OSA treatment repurposing. ECM1, however, lacks recorded targeted drug development, and its feasibility requires further research, particularly given its HEIDI heterogeneity (p=0.041). ITGA2’s role in airway remodeling supports its relevance for structural OSA interventions, while ECM1 may suit OSA subtypes with metabolic or fibrotic features. The modest effect sizes suggest combination therapies may be needed for significant risk reduction, and public policy could prioritize genetic screening for risk stratification, pending mechanistic and interventional validation. |
| 17 | **Generalizability** | Discuss the generalizability of the study results (a) to other populations, (b) across other exposure periods/timings, and (c) across other levels of exposure |  | The generalizability of our findings on ITGA2 and ECM1 as OSA drug targets requires careful evaluation. (a) To other populations: Using eQTLGen (31,684 European samples) and FinnGen (38,998 OSA cases, 336,659 controls), our results are limited to European ancestry. Genetic and OSA prevalence differences in non-European populations (e.g., Asian or African) may alter effect sizes (ITGA2: OR=1.1019; ECM1: OR=1.1646). Future studies should validate these findings in diverse cohorts. (b) Across other exposure periods/timings: MR reflects lifelong gene expression effects, but OSA risk varies with age or disease stage. MetaXcan’s tissue-specific effects (e.g., ITGA2 in hippocampus, z=2.23, p=0.025; ECM1 in hypothalamus, z=3.58, p=0.0003) suggest relevance across life stages, though longitudinal data are needed. (c) Across other levels of exposure: The modest ORs (ITGA2: 1.10, ECM1: 1.19) are based on a 1 SD increase in expression, but higher or lower levels (e.g., via drugs like Vatelizumab for ITGA2) may yield different risks. ECM1’s HEIDI heterogeneity (p=0.041) and MetaXcan’s unvalidated tissue effects (lacking airway-specific data) suggest non-linear exposure-response relationships, requiring functional validation in airway smooth muscle cells or animal models. Future stratified analyses across OSA subtypes could enhance generalizability, as could single-cell transcriptomics to clarify tissue-specific roles. |
|  | **OTHER INFORMATION** |  |  |  |
| 18 | **Funding** | Describe sources of funding and the role of funders in the present study and, if applicable, sources of funding for the databases and original study or studies on which the present study is based |  | This work was supported by the National Natural Science Foundation of China (No. 81660020), the Inner Mongolia Science and Technology Research Program (Project No. 2021GG0219), and the Inner Mongolia Natural Science Foundation (Grant No. 110-202343809), which provided financial support for data analysis and manuscript preparation. The funders had no role in the study design, data collection, analysis, interpretation of results, or writing of the manuscript |
| 19 | **Data and data sharing** | Provide the data used to perform all analyses or report where and how the data can be accessed, and reference these sources in the article. Provide the statistical code needed to reproduce the results in the article, or report whether the code is publicly accessible and if so, where |  | The data used for all analyses are derived from publicly accessible consortia and databases. Gene expression data were obtained from the eQTLGen consortium (31,684 European blood samples, accessible at [https://www.eqtlgen.org/](https://www.eqtlgen.org/" \t "_blank)), and OSA case-control data were sourced from FinnGen (R9, 38,998 cases and 336,659 controls), which requires an application for access via [https://www.finngen.fi/en/access](https://www.finngen.fi/en/access" \t "_blank). Tissue-specific expression analyses were performed using MetaXcan with GTEx v8 data, available via the GTEx portal ([https://gtexportal.org/](https://gtexportal.org/" \t "_blank)). SMR analyses utilized summary statistics from eQTL and GWAS data, processed with SMR software (version 1.3.1.win). These data sources are referenced throughout the article. The statistical code, implemented using the TwoSampleMR R package for Mendelian randomization analyses, is not publicly shared but can be obtained by contacting the corresponding author upon reasonable request. |
| 20 | **Conflicts of Interest** | All authors should declare all potential conflicts of interest |  | All authors confirm they have no potential conflicts of interest to declare. There are no financial or non-financial interests, such as affiliations with pharmaceutical companies, patents, or personal relationships, that could influence the study design, data interpretation, or manuscript preparation. The study utilized publicly available data (eQTLGen, FinnGen, GTEx v8) and was funded by the Inner Mongolia Science and Technology Research Program (Project No. 2021GG0219) and the Inner Mongolia Natural Science Foundation (Grant No. 110-202343809), with no involvement of funders in the research process. |

This checklist is copyrighted by the Equator Network under the Creative Commons Attribution 3.0 Unported (CC BY 3.0) license.

1. Skrivankova VW, Richmond RC, Woolf BAR, Yarmolinsky J, Davies NM, Swanson SA, et al. Strengthening the Reporting of Observational Studies in Epidemiology using Mendelian Randomization (STROBE-MR) Statement. JAMA. 2021;under review.

2. Skrivankova VW, Richmond RC, Woolf BAR, Davies NM, Swanson SA, VanderWeele TJ, et al. Strengthening the Reporting of Observational Studies in Epidemiology using Mendelian Randomisation (STROBE-MR): Explanation and Elaboration. BMJ. 2021;375:n2233.
